# Supplementary material for: Population genetic analysis of shotgun assemblies of genomic sequences from multiple individuals
Source: HighWire-hosted journal article supplement (doi:10.1101/gr.074187.107), 2008-04-14

Supplementary Figure S1

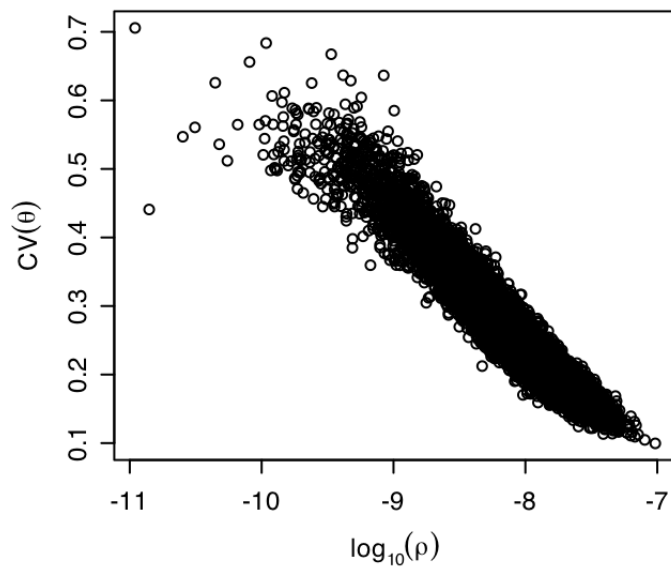

Supplementary Figure S2

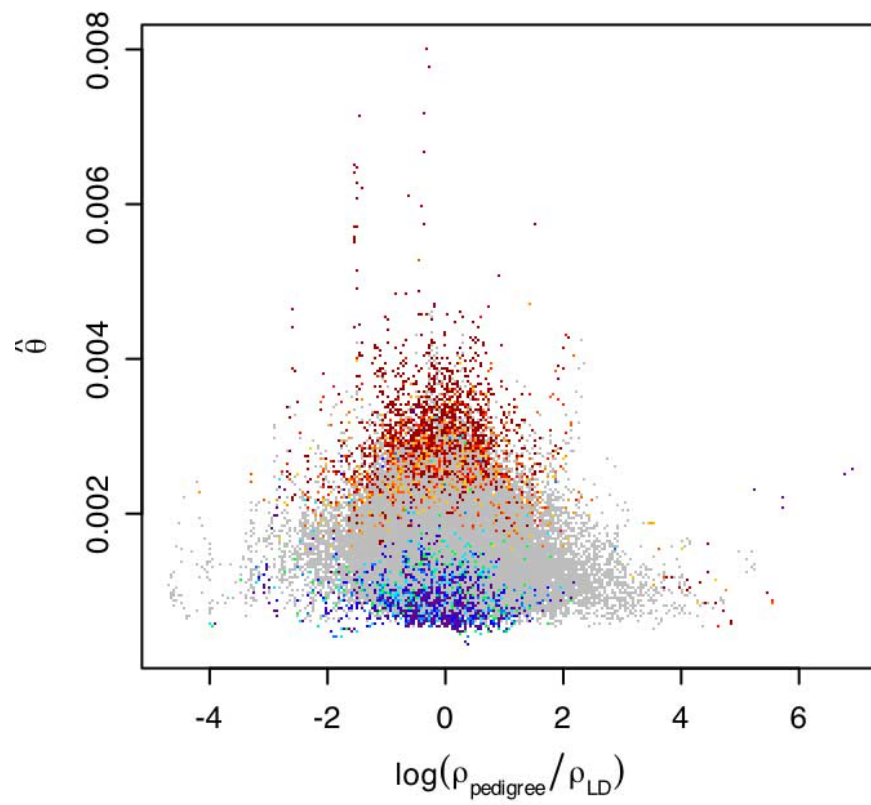

# Supplementary Figure S3

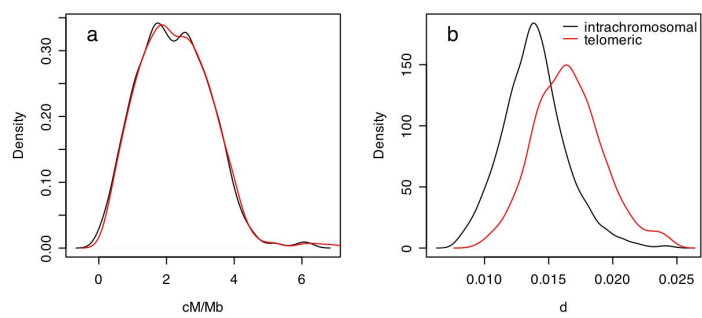

## Supplementary Figure S4

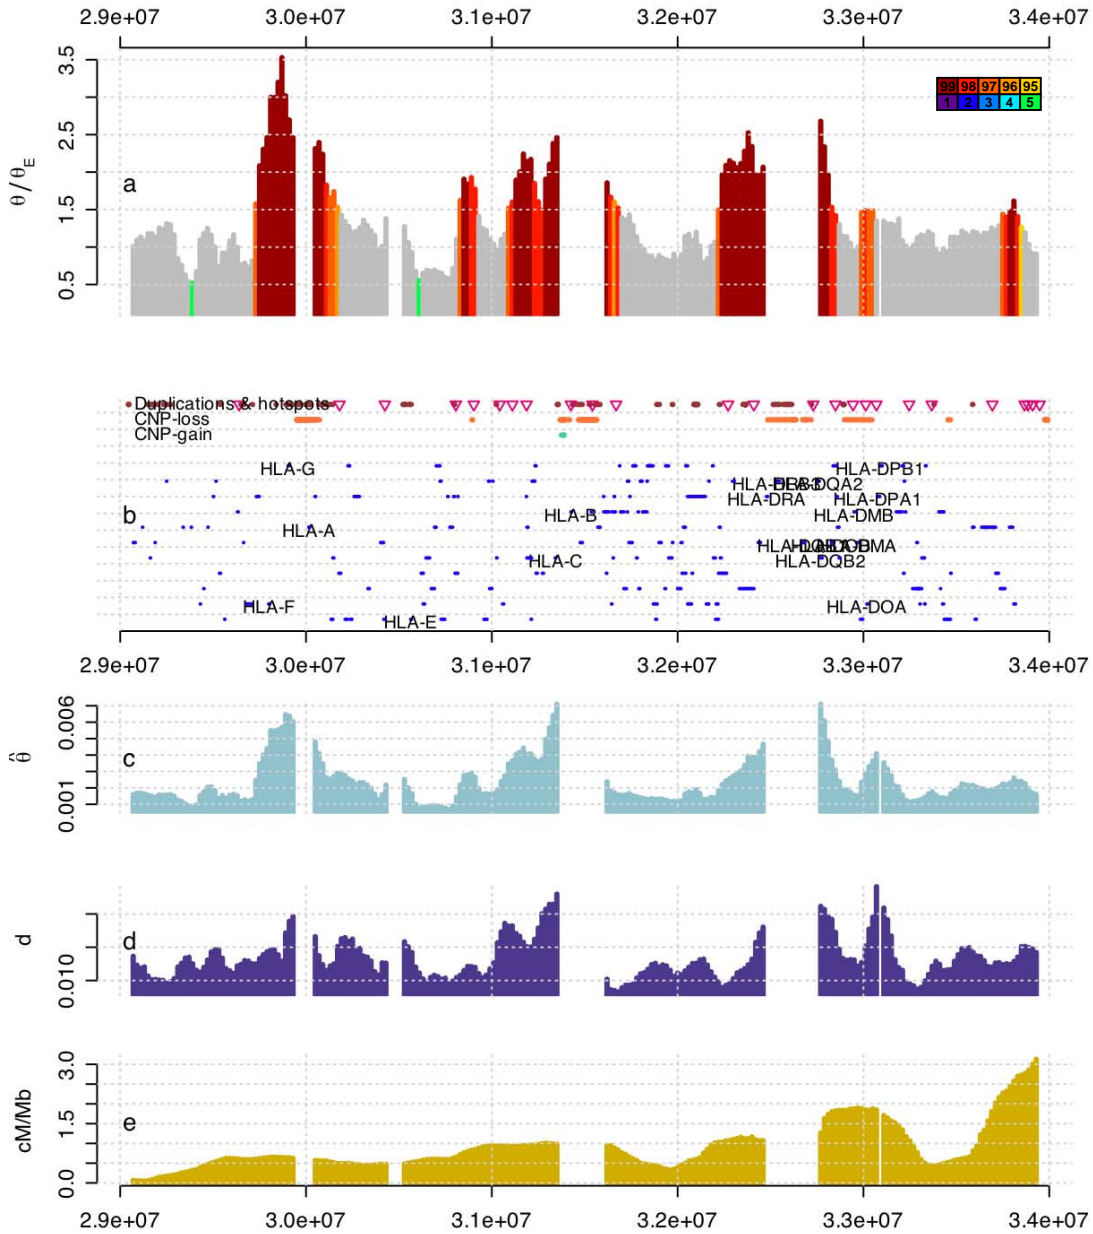

# Supplementary Figure S5

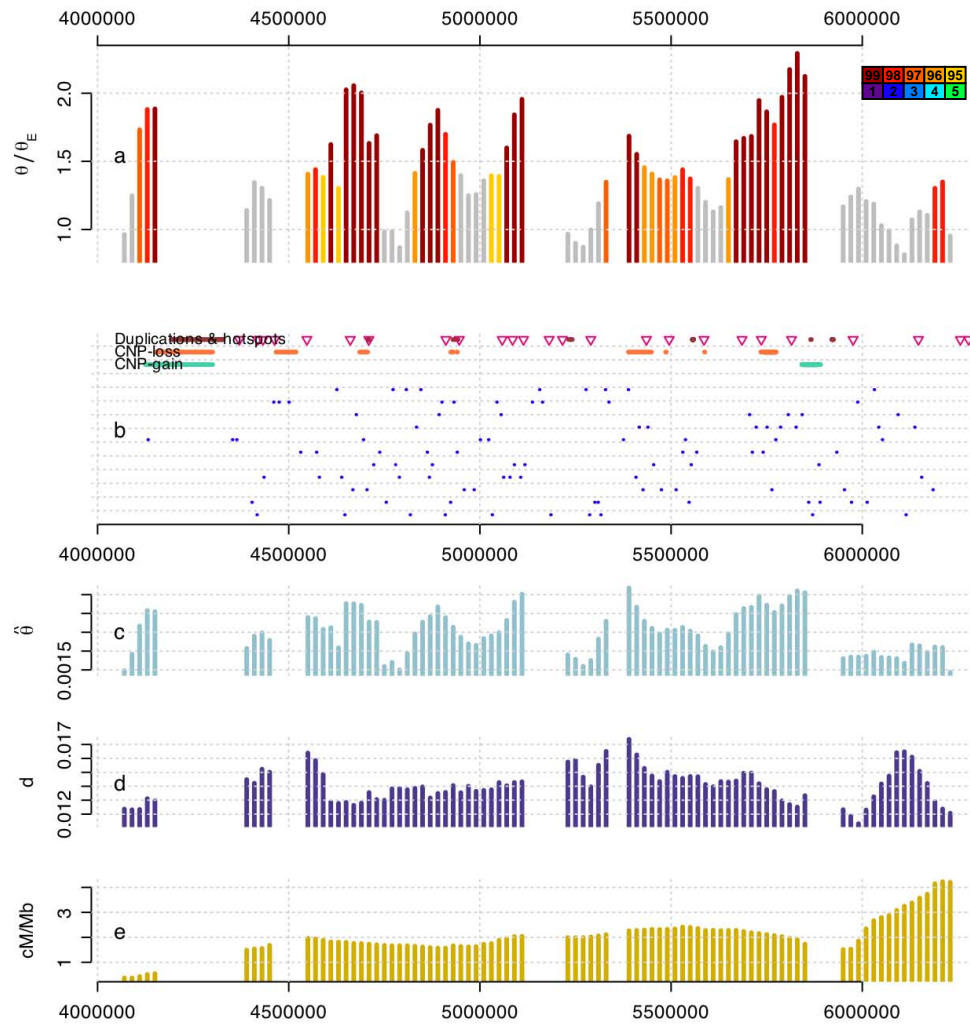

Supplementary Figure S6

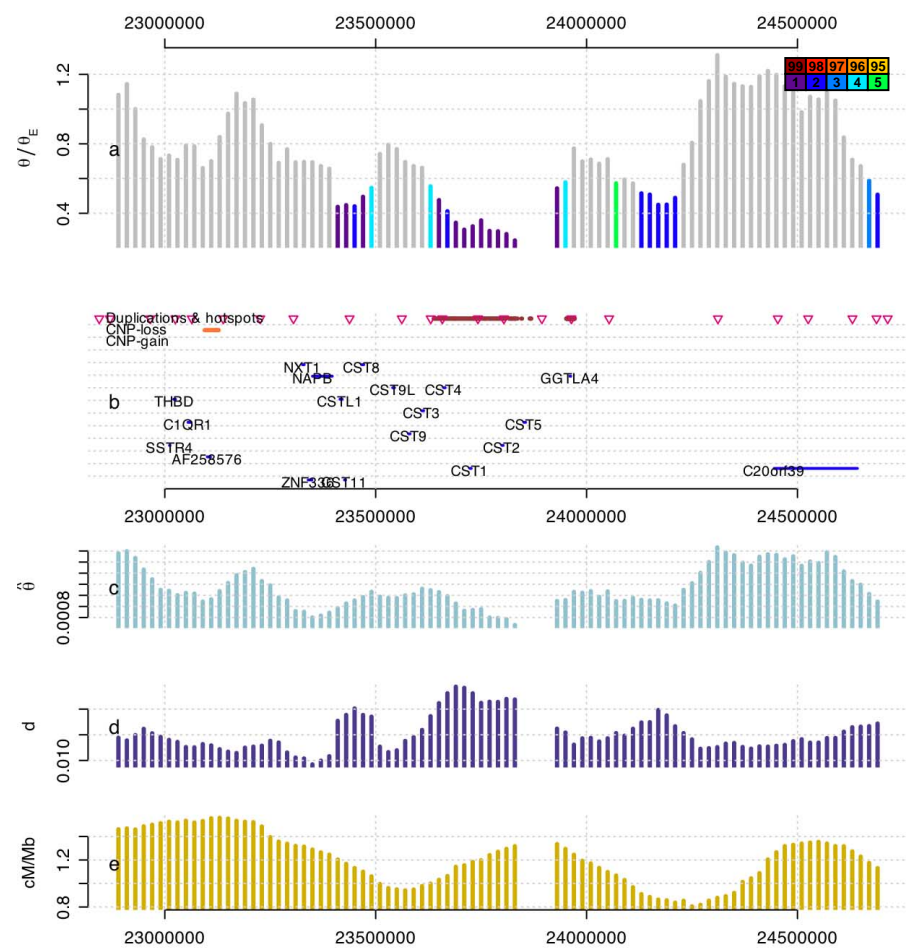

Supplement: Pages_from_HellmannGR74187.pdf [file Pages_from_HellmannGR74187.pdf]
